# Supplementary material for: A bedform phase diagram for dense granular currents
Source: PubMed Central journal article supplement (PMC7280512; doi:10.1038/s41467-020-16657-z), 2020-06-08
Supplement: 41467_2020_16657_MOESM1_ESM.pdf [file 41467_2020_16657_MOESM1_ESM.pdf]

Supplementary Information for **A bedform phase diagram for dense granular currents** by Smith et al.

## Supplementary Figures

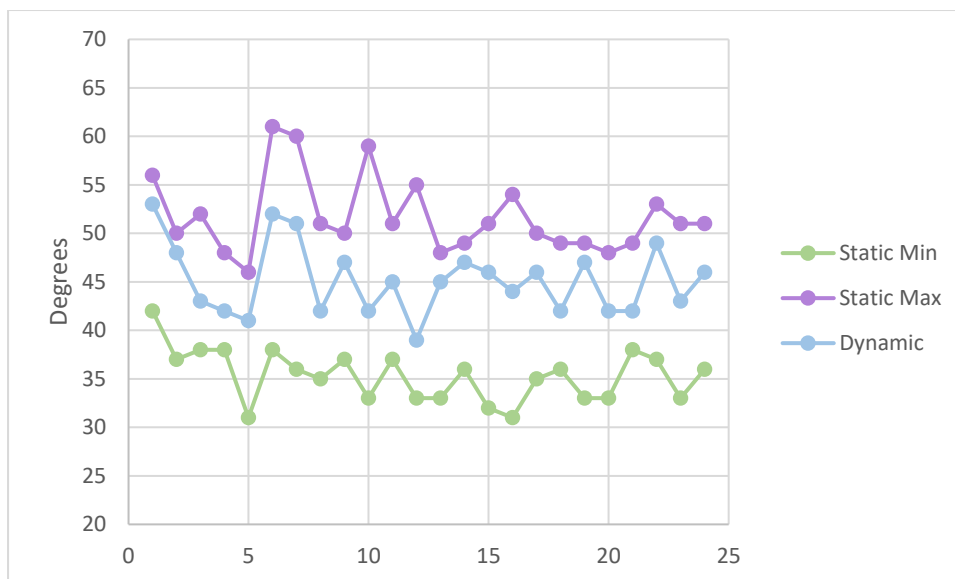

Supplementary Figure 1. Results of rotating drum tests on Pozzolane Rosse ignimbrite samples. Dynamic, maximum and minimum static repose angles are given. X axis is test number.

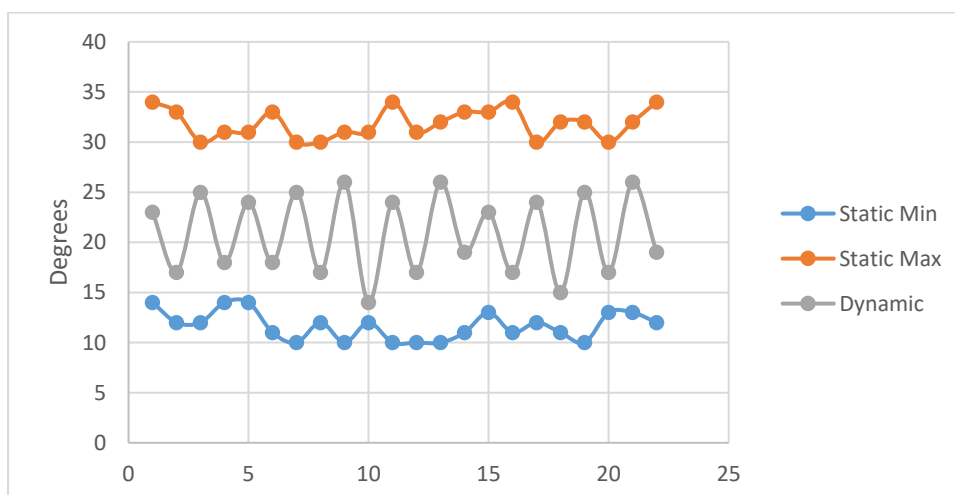

Supplementary Figure 2. Results of rotating drum tests on ballotini samples. Dynamic, maximum and minimum static repose angles are given. X axis is test number.

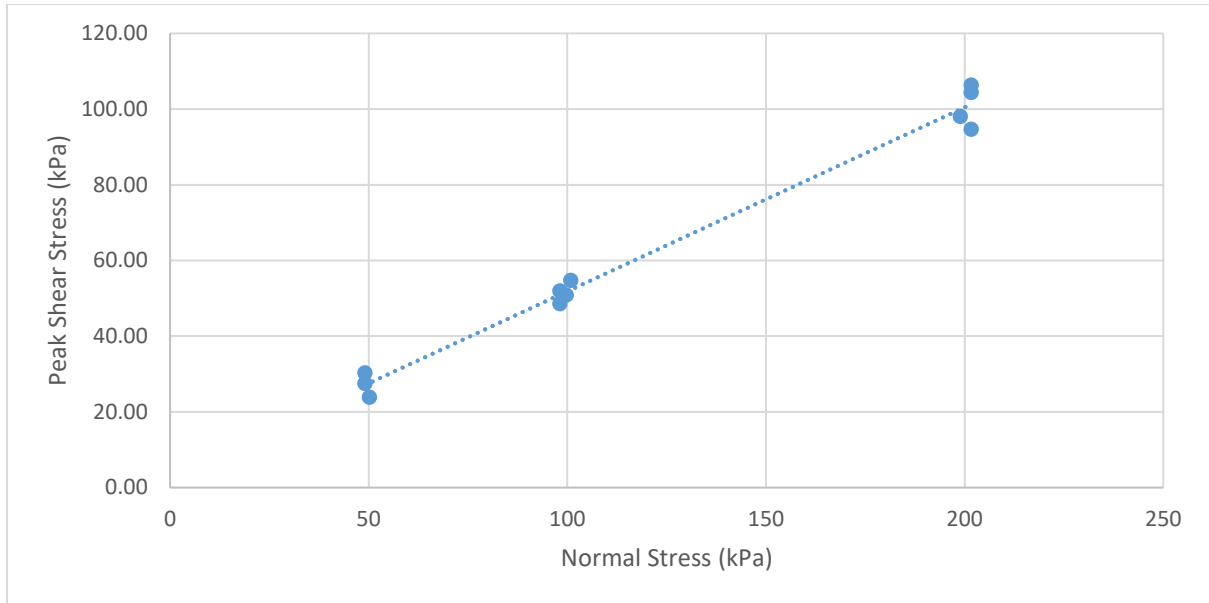

Supplementary Figure 3. Results of shearbox testing on ballotini samples. Cohesion value given by intersect with y-axis. Internal friction angle given by value of slope.

## Supplementary Tables

Supplementary Table 1. Experimental current data for five runs.

| Run    | Bedform            | Current velocity | Current thickness | Froude Number | Savage number | Bagnold Number | Friction Number |
|--------|--------------------|------------------|-------------------|---------------|---------------|----------------|-----------------|
| 1      | Steep Regressive   | 0.44             | 0.0081            | 1.6           | 0.0003        | 41.6           | 132552          |
|        |                    | 0.36             | 0.0060            | 1.5           | 0.0005        | 46.0           | 88893           |
|        |                    | 0.22             | 0.0059            | 0.9           | 0.0002        | 28.6           | 140654          |
|        |                    | 0.40             | 0.0090            | 1.3           | 0.0002        | 33.7           | 181828          |
|        |                    | 0.35             | 0.0075            | 1.3           | 0.0002        | 35.4           | 144308          |
|        |                    | 0.33             | 0.0110            | 1.0           | 0.0001        | 23.0           | 325943          |
|        |                    | 0.40             | 0.0107            | 1.2           | 0.0001        | 28.4           | 257005          |
|        |                    | 0.36             | 0.0102            | 1.1           | 0.0001        | 27.0           | 256902          |
|        |                    | 0.44             | 0.0062            | 1.8           | 0.0007        | 54.4           | 77661           |
|        |                    | 0.33             | 0.0078            | 1.2           | 0.0002        | 31.6           | 168089          |
|        | Shallow Regressive | 0.75             | 0.0120            | 2.2           | 0.0003        | 47.4           | 172399          |
|        |                    | 0.73             | 0.0093            | 2.4           | 0.0006        | 59.8           | 105901          |
|        |                    | 0.73             | 0.0078            | 2.7           | 0.0010        | 71.3           | 74494           |
|        |                    | 0.80             | 0.0075            | 2.9           | 0.0013        | 80.9           | 63135           |
|        |                    | 0.50             | 0.0068            | 1.9           | 0.0007        | 55.8           | 83039           |
|        |                    | 0.50             | 0.0070            | 1.9           | 0.0006        | 54.2           | 87996           |
|        |                    | 0.60             | 0.0053            | 2.6           | 0.0020        | 85.9           | 42037           |
|        |                    | 0.53             | 0.0047            | 2.5           | 0.0023        | 86.1           | 37190           |
|        |                    | 0.45             | 0.0043            | 2.2           | 0.0022        | 79.4           | 36894           |
|        |                    | 0.33             | 0.0047            | 1.5           | 0.0009        | 52.4           | 61031           |
|        |                    | 0.95             | 0.0100            | 3.0           | 0.0008        | 72.1           | 94517           |
|        |                    | 0.63             | 0.0079            | 2.3           | 0.0007        | 60.8           | 88482           |
|        |                    | 0.70             | 0.0050            | 3.2           | 0.0033        | 106.2          | 32068           |
|        |                    | 0.70             | 0.0043            | 3.4           | 0.0052        | 123.5          | 23718           |
|        |                    | 0.63             | 0.0054            | 2.8           | 0.0022        | 89.0           | 41342           |
|        |                    | 0.80             | 0.0070            | 3.1           | 0.0016        | 86.7           | 54997           |
|        |                    | 0.44             | 0.0062            | 1.8           | 0.0007        | 54.4           | 77661           |
|        |                    | 0.90             | 0.0078            | 3.3           | 0.0014        | 87.5           | 60699           |
|        |                    | 0.80             | 0.0071            | 3.0           | 0.0015        | 85.5           | 56580           |
|        |                    | 0.80             | 0.0068            | 3.1           | 0.0017        | 89.2           | 51899           |
|        |                    | 0.76             | 0.0068            | 2.9           | 0.0016        | 84.8           | 54631           |
|        |                    | 0.80             | 0.0075            | 2.9           | 0.0013        | 80.9           | 63135           |
| 0.67   | 0.0065             | 2.6              | 0.0014            | 77.8          | 56905         |                |                 |
| 0.67   | 0.0064             | 2.7              | 0.0014            | 79.0          | 55168         |                |                 |
| 0.50   | 0.0060             | 2.1              | 0.0010            | 63.2          | 64650         |                |                 |
| Planar | 1.00               | 0.0057           | 4.2               | 0.0046        | 133.1         | 29173          |                 |
|        | 1.27               | 0.0043           | 6.2               | 0.0170        | 223.4         | 13107          |                 |
|        | 0.90               | 0.0050           | 4.1               | 0.0055        | 136.5         | 24942          |                 |
|        | 1.05               | 0.0048           | 4.8               | 0.0084        | 165.9         | 19703          |                 |
|        | 0.80               | 0.0043           | 3.9               | 0.0068        | 141.1         | 20753          |                 |

|      |                  |      |                    |       |        |       |        |
|------|------------------|------|--------------------|-------|--------|-------|--------|
|      |                  | 1.10 | 0.0031             | 6.3   | 0.0343 | 269.1 | 7845   |
|      |                  | 1.10 | 0.0036             | 5.9   | 0.0219 | 231.7 | 10579  |
|      |                  | 0.88 | 0.0032             | 5.0   | 0.0200 | 208.6 | 10448  |
|      |                  | 0.63 | 0.0031             | 3.6   | 0.0112 | 153.8 | 13728  |
|      |                  | 0.95 | 0.0040             | 4.8   | 0.0119 | 180.1 | 15123  |
|      |                  | 1.05 | 0.0057             | 4.4   | 0.0050 | 139.7 | 27784  |
|      |                  | 1.33 | 0.0064             | 5.3   | 0.0057 | 158.0 | 27584  |
|      |                  | 1.00 | 0.0069             | 3.8   | 0.0026 | 109.9 | 42750  |
|      |                  | 1.00 | 0.0055             | 4.3   | 0.0051 | 137.9 | 27162  |
|      |                  | 0.95 | 0.0057             | 4.0   | 0.0041 | 126.4 | 30709  |
|      |                  | 0.90 | 0.0038             | 4.7   | 0.0125 | 179.6 | 14407  |
|      | Steep Regressive | 0.63 | 0.0127             | 1.8   | 0.0002 | 37.8  | 228670 |
|      |                  | 0.50 | 0.0092             | 1.7   | 0.0003 | 41.2  | 151999 |
|      |                  | 0.33 | 0.0072             | 1.3   | 0.0003 | 35.1  | 139644 |
|      |                  | 0.67 | 0.0107             | 2.1   | 0.0003 | 47.3  | 154203 |
|      |                  | 0.40 | 0.0069             | 1.5   | 0.0004 | 44.0  | 106874 |
|      |                  | 0.53 | 0.0099             | 1.7   | 0.0002 | 40.2  | 167628 |
|      |                  | 0.33 | 0.0081             | 1.2   | 0.0002 | 31.2  | 176736 |
|      |                  | 0.67 | 0.0125             | 1.9   | 0.0002 | 40.4  | 210449 |
|      |                  | 0.40 | 0.0127             | 1.1   | 0.0001 | 23.9  | 362061 |
|      |                  | 0.25 | 0.0121             | 0.7   | 0.0000 | 15.7  | 525854 |
|      |                  | 2    | Shallow Regressive | 1.00  | 0.0113 | 3.0   | 0.0006 |
| 0.90 | 0.0091           |      |                    | 3.0   | 0.0009 | 75.2  | 82255  |
| 0.73 | 0.0071           |      |                    | 2.8   | 0.0013 | 78.3  | 61723  |
| 0.73 | 0.0077           |      |                    | 2.7   | 0.0010 | 72.2  | 72596  |
| 0.50 | 0.0062           |      |                    | 2.0   | 0.0009 | 61.2  | 69032  |
| 0.67 | 0.0048           |      |                    | 3.1   | 0.0034 | 105.3 | 31032  |
| 0.40 | 0.0038           |      |                    | 2.1   | 0.0025 | 79.8  | 32415  |
| 0.95 | 0.0065           |      |                    | 3.8   | 0.0028 | 110.8 | 39934  |
| 0.70 | 0.0051           |      |                    | 3.1   | 0.0031 | 104.1 | 33364  |
| 0.67 | 0.0044           |      |                    | 3.2   | 0.0044 | 114.9 | 26075  |
| 0.73 | 0.0045           |      |                    | 3.5   | 0.0050 | 123.6 | 24795  |
|      | Planar           | 0.36 | 0.0041             | 1.8   | 0.0016 | 67.3  | 41508  |
|      |                  | 0.63 | 0.0055             | 2.7   | 0.0020 | 86.2  | 43459  |
|      |                  | 0.80 | 0.0051             | 3.6   | 0.0041 | 119.0 | 29193  |
|      |                  | 0.67 | 0.0035             | 3.6   | 0.0088 | 144.5 | 16499  |
|      |                  | 0.70 | 0.0047             | 3.3   | 0.0040 | 113.0 | 28336  |
|      |                  | 0.95 | 0.0059             | 3.9   | 0.0037 | 122.1 | 32901  |
|      |                  | 0.55 | 0.0049             | 2.5   | 0.0022 | 85.1  | 39198  |
|      |                  | 0.67 | 0.0045             | 3.2   | 0.0041 | 112.4 | 27274  |
|      |                  | 1.67 | 0.0090             | 5.6   | 0.0032 | 140.4 | 43639  |
|      |                  | 1.25 | 0.0083             | 4.4   | 0.0023 | 114.2 | 49486  |
|      |                  | 1.25 | 0.0089             | 4.2   | 0.0019 | 106.5 | 56899  |
| 1.50 | 0.0084           | 5.2  | 0.0032             | 135.4 | 42238  |       |        |
| 1.25 | 0.0082           | 4.4  | 0.0024             | 115.6 | 48301  |       |        |
| 1.47 | 0.0082           | 5.2  | 0.0033             | 135.7 | 41165  |       |        |

|        |                    |        |        |        |        |       |        |
|--------|--------------------|--------|--------|--------|--------|-------|--------|
|        |                    | 1.10   | 0.0078 | 4.0    | 0.0022 | 107.0 | 49663  |
|        |                    | 1.50   | 0.0110 | 4.6    | 0.0014 | 103.4 | 72432  |
|        |                    | 1.25   | 0.0100 | 4.0    | 0.0013 | 94.8  | 71833  |
|        |                    | 1.00   | 0.0082 | 3.5    | 0.0015 | 92.5  | 60376  |
|        |                    | 0.95   | 0.0080 | 3.4    | 0.0015 | 90.1  | 60491  |
|        |                    | 1.25   | 0.0071 | 4.7    | 0.0037 | 133.5 | 36211  |
|        |                    | 1.25   | 0.0074 | 4.6    | 0.0033 | 128.1 | 39336  |
|        |                    | 1.10   | 0.0067 | 4.3    | 0.0034 | 124.5 | 36643  |
|        |                    | 1.20   | 0.0071 | 4.5    | 0.0034 | 128.2 | 37720  |
| 3      | Steep Regressive   | 0.67   | 0.0125 | 1.9    | 0.0002 | 40.4  | 210449 |
|        |                    | 0.67   | 0.0094 | 2.2    | 0.0005 | 53.8  | 119009 |
|        |                    | 0.53   | 0.0099 | 1.7    | 0.0002 | 40.2  | 167628 |
|        |                    | 0.35   | 0.0095 | 1.1    | 0.0001 | 27.9  | 231533 |
|        |                    | 0.70   | 0.0145 | 1.9    | 0.0001 | 36.6  | 269695 |
|        |                    | 0.45   | 0.0117 | 1.3    | 0.0001 | 29.2  | 273145 |
|        |                    | 0.45   | 0.0109 | 1.4    | 0.0001 | 31.3  | 237069 |
|        |                    | 0.50   | 0.0123 | 1.4    | 0.0001 | 30.8  | 271691 |
|        |                    | 0.42   | 0.0092 | 1.4    | 0.0002 | 34.3  | 182399 |
|        | Shallow Regressive | 0.73   | 0.0110 | 2.2    | 0.0003 | 50.6  | 148156 |
|        |                    | 1.00   | 0.0100 | 3.2    | 0.0008 | 75.8  | 89791  |
|        |                    | 0.88   | 0.0096 | 2.9    | 0.0007 | 69.5  | 94036  |
|        |                    | 0.50   | 0.0085 | 1.7    | 0.0003 | 44.6  | 129749 |
|        |                    | 1.00   | 0.0076 | 3.7    | 0.0019 | 99.8  | 51863  |
|        |                    | 0.90   | 0.0075 | 3.3    | 0.0016 | 91.0  | 56120  |
|        |                    | 1.00   | 0.0075 | 3.7    | 0.0020 | 101.1 | 50508  |
|        |                    | 0.80   | 0.0078 | 2.9    | 0.0012 | 78.3  | 67414  |
|        |                    | 0.80   | 0.0070 | 3.1    | 0.0016 | 86.7  | 54997  |
|        |                    | 0.67   | 0.0087 | 2.3    | 0.0006 | 58.1  | 101945 |
| 0.80   | 0.0091             | 2.7    | 0.0007 | 66.7   | 92945  |       |        |
| Planar | 1.47               | 0.0083 | 5.1    | 0.0032 | 134.0  | 42175 |        |
|        | 1.40               | 0.0067 | 5.5    | 0.0055 | 158.5  | 28791 |        |
|        | 1.00               | 0.0073 | 3.7    | 0.0022 | 103.9  | 47850 |        |
|        | 1.47               | 0.0070 | 5.6    | 0.0053 | 158.9  | 29998 |        |
|        | 0.90               | 0.0064 | 3.6    | 0.0026 | 106.7  | 40865 |        |
|        | 1.05               | 0.0061 | 4.3    | 0.0041 | 130.5  | 31820 |        |
|        | 1.33               | 0.0100 | 4.3    | 0.0015 | 101.1  | 67344 |        |
|        | 1.00               | 0.0081 | 3.5    | 0.0016 | 93.6   | 58912 |        |
|        | 1.00               | 0.0090 | 3.4    | 0.0012 | 84.3   | 72731 |        |
|        | 1.05               | 0.0073 | 3.9    | 0.0024 | 109.1  | 45571 |        |
| 0.90   | 0.0073             | 3.4    | 0.0018 | 93.5   | 53166  |       |        |
| 4      | Steep Regressive   | 0.31   | 0.0103 | 1.0    | 0.0001 | 22.7  | 309594 |
|        |                    | 0.33   | 0.0067 | 1.3    | 0.0003 | 37.7  | 120922 |
|        | Shallow Regre      | 0.67   | 0.0089 | 2.3    | 0.0005 | 56.8  | 106686 |
|        |                    | 0.50   | 0.0083 | 1.8    | 0.0004 | 45.7  | 123715 |

|   |                       |        |        |        |        |        |        |       |
|---|-----------------------|--------|--------|--------|--------|--------|--------|-------|
|   |                       | 0.73   | 0.0092 | 2.4    | 0.0006 | 60.5   | 103636 |       |
|   |                       | 0.80   | 0.0084 | 2.8    | 0.0009 | 72.2   | 79196  |       |
|   | Planar                | 0.80   | 0.0091 | 2.7    | 0.0007 | 66.7   | 92945  |       |
|   |                       | 1.00   | 0.0070 | 3.8    | 0.0025 | 108.3  | 43998  |       |
|   |                       | 1.05   | 0.0081 | 3.7    | 0.0018 | 98.3   | 56107  |       |
|   |                       |        |        |        |        |        |        |       |
| 5 | Shallow<br>Regressive | 0.67   | 0.0094 | 2.2    | 0.0005 | 53.8   | 119009 |       |
|   |                       | 0.73   | 0.0089 | 2.5    | 0.0006 | 62.5   | 96987  |       |
|   |                       | 0.50   | 0.0080 | 1.8    | 0.0004 | 47.4   | 114933 |       |
|   |                       | 0.44   | 0.0066 | 1.7    | 0.0006 | 51.1   | 88005  |       |
|   |                       | Planar | 1.10   | 0.0074 | 4.1    | 0.0025 | 112.7  | 44700 |
|   |                       |        | 1.20   | 0.0068 | 4.6    | 0.0039 | 133.8  | 34600 |
|   |                       |        | 1.05   | 0.0071 | 4.0    | 0.0026 | 112.2  | 43108 |
|   |                       |        | 1.00   | 0.0065 | 4.0    | 0.0031 | 116.7  | 37937 |
|   |                       |        | 1.05   | 0.0070 | 4.0    | 0.0027 | 113.8  | 41903 |
|   |                       |        | 1.33   | 0.0067 | 5.2    | 0.0050 | 150.9  | 30231 |
|   |                       |        |        |        |        |        |        |       |

Supplementary Table 2. Grain size data for samples from the Pozzolane Rosse ignimbrite.

|          | Fraction (mm) | Mass (g)     | Proportion | Cumulative Percentage | Fraction (phi) |
|----------|---------------|--------------|------------|-----------------------|----------------|
| Sample A | >5.6          | 13.40        | 0.40       | 100.00%               | -5.00          |
|          | 2-5.6         | 12.45        | 0.37       | 59.89%                | -2.49          |
|          | 600-2         | 4.38         | 0.13       | 22.63%                | -1.00          |
|          | 300-600       | 1.19         | 0.04       | 9.52%                 | 0.74           |
|          | 150-300       | 0.94         | 0.03       | 5.96%                 | 1.74           |
|          | 63-150        | 0.75         | 0.02       | 3.15%                 | 2.74           |
|          | <63           | 0.30         | 0.01       | 0.90%                 | 3.99           |
|          |               | <b>SUM</b>   |            | 0                     | 7.97           |
|          |               | <b>33.41</b> |            |                       |                |
| Sample B | >5.6          | 11.80        | 0.33       | 100.00%               | -5.00          |
|          | 2-5.6         | 9.99         | 0.28       | 67.12%                | -2.49          |
|          | 600-2         | 6.39         | 0.18       | 39.28%                | -1.00          |
|          | 300-600       | 2.60         | 0.07       | 21.47%                | 0.74           |
|          | 150-300       | 2.17         | 0.06       | 14.21%                | 1.74           |
|          | 63-150        | 1.92         | 0.05       | 8.18%                 | 2.74           |
|          | <63           | 1.02         | 0.03       | 2.83%                 | 3.99           |
|          |               | <b>SUM</b>   |            | 0                     | 7.97           |
|          |               | <b>35.89</b> |            |                       |                |
| Sample C | >5.6          | 17.60        | 0.60       | 100.00%               | -5.00          |
|          | 2-5.6         | 4.04         | 0.14       | 39.67%                | -2.49          |
|          | 600-2         | 3.21         | 0.11       | 25.83%                | -1.00          |
|          | 300-600       | 1.38         | 0.05       | 14.82%                | 0.74           |
|          | 150-300       | 1.23         | 0.04       | 10.09%                | 1.74           |
|          | 63-150        | 1.21         | 0.04       | 5.87%                 | 2.74           |
|          | <63           | 0.51         | 0.02       | 1.74%                 | 3.99           |
|          |               | <b>SUM</b>   |            | 0                     | 7.97           |
|          |               | <b>29.17</b> |            |                       |                |
| Sample D | >5.6          | 8.50         | 0.28       | 100.00%               | -5.00          |
|          | 2-5.6         | 10.78        | 0.36       | 71.71%                | -2.49          |
|          | 600-2         | 5.54         | 0.18       | 35.84%                | -1.00          |
|          | 300-600       | 1.96         | 0.07       | 17.40%                | 0.74           |
|          | 150-300       | 1.49         | 0.05       | 10.89%                | 1.74           |
|          | 63-150        | 1.26         | 0.04       | 5.95%                 | 2.74           |
|          | <63           | 0.53         | 0.02       | 1.75%                 | 3.99           |
|          |               | <b>SUM</b>   |            | 0                     | 7.97           |
|          |               | <b>30.05</b> |            |                       |                |
| Sample E | >5.6          | 2.60         | 0.09       | 100.00%               | -5.00          |
|          | 2-5.6         | 10.99        | 0.39       | 90.84%                | -2.49          |
|          | 600-2         | 7.71         | 0.27       | 52.12%                | -1.00          |
|          | 300-600       | 2.53         | 0.09       | 24.98%                | 0.74           |
|          | 150-300       | 1.85         | 0.07       | 16.07%                | 1.74           |



|          |              |      |      |         |       |
|----------|--------------|------|------|---------|-------|
|          | 63-150       | 1.66 | 0.06 | 9.56%   | 2.74  |
|          | <63          | 1.06 | 0.04 | 3.72%   | 3.99  |
|          | <b>SUM</b>   |      |      | 0       | 7.97  |
|          | <b>28.39</b> |      |      |         |       |
| Sample F | >5.6         | 7.50 | 0.30 | 100.00% | -5.00 |
|          | 2-5.6        | 8.97 | 0.36 | 69.91%  | -2.49 |
|          | 600-2        | 4.76 | 0.19 | 33.91%  | -1.00 |
|          | 300-600      | 1.79 | 0.07 | 14.82%  | 0.74  |
|          | 150-300      | 1.10 | 0.04 | 7.66%   | 1.74  |
|          | 63-150       | 0.66 | 0.03 | 3.26%   | 2.74  |
|          | <63          | 0.16 | 0.01 | 0.63%   | 3.99  |
|          | <b>SUM</b>   |      |      | 0       | 7.97  |
|          | <b>24.93</b> |      |      |         |       |

Supplementary Table 3. Supplementary mechanical data for ballotini.

|                                                           | 50kPa   |        |        |        | 100kPa |        |        | 200kPa  |        |        |
|-----------------------------------------------------------|---------|--------|--------|--------|--------|--------|--------|---------|--------|--------|
|                                                           | Test 1  | Test 2 | Test 3 | Test 4 | Test 1 | Test 2 | Test 3 | Test 1  | Test 2 | Test 3 |
| <b>Sample Height (mm)</b>                                 | 3.87    | 3.21   | 4.44   | 8.13   | 4.89   | 6.35   | 3.15   | 3.32    | 5.85   | 4.86   |
|                                                           | 3.44    | 3.81   | 6.2    | 4.99   | 5.55   | 6.46   | 4.78   | 6.15    | 2.01   | 2.92   |
|                                                           | 3.40    | 3.2    | 5.21   | 4.06   | 3.61   | 6.4    | 6.54   | 2.87    | 5.76   | 7.09   |
|                                                           | 4.23    | 3.26   | 5.76   | 2.74   | 2.9    | 4.29   | 9.37   | 4.87    | 6.39   | 5.76   |
| <b>Av. Sample Height (mm)</b>                             | 3.74    | 3.37   | 5.40   | 4.98   | 4.24   | 5.88   | 5.96   | 4.30    | 5.00   | 5.16   |
| <b>Consolidation (mm)</b>                                 | 0.392   | 0.2    | 0.204  | 0.227  | 0.665  | 0.51   | 0.404  | 0.821   | 0.637  | 0.746  |
| <b>Mass (kg)</b>                                          | 1.84    | 1.8    | 1.8    | 1.8    | 3.66   | 3.6    | 3.6    | 7.3     | 7.4    | 7.4    |
| <b>Force (N)</b>                                          | 18.05   | 17.66  | 17.66  | 17.66  | 35.90  | 35.32  | 35.32  | 71.61   | 72.59  | 72.59  |
| <b>Shear rate (mm/min)</b>                                | 0.5     | 0.5    | 0.5    | 0.5    | 0.5    | 0.5    | 0.5    | 0.5     | 0.5    | 0.5    |
| <b>Area (m<sup>2</sup>)</b>                               | 0.0036  | 0.0036 | 0.0036 | 0.0036 | 0.0036 | 0.0036 | 0.0036 | 0.0036  | 0.0036 | 0.0036 |
| <b>Load (N/m<sup>2</sup>)</b>                             | 5014    | 4905   | 4905   | 4905   | 9973.5 | 9810   | 9810   | 19892.5 | 20165  | 20165  |
| <b>Lever effect</b>                                       | 10      | 10     | 10     | 10     | 10     | 10     | 10     | 10      | 10     | 10     |
| <b>Normal Stress (kPa)</b>                                | 50.14   | 49.05  | 49.05  | 49.05  | 99.735 | 98.1   | 98.1   | 198.925 | 201.65 | 201.65 |
| <b>Peak Shear Force (N)</b>                               | 86      | 109    | 99     | 97     | 183    | 175    | 187    | 353     | 383    | 341    |
| <b>Shear Stress (kPa)</b>                                 | 23.89   | 30.28  | 27.50  | 26.94  | 50.83  | 48.61  | 51.94  | 98.06   | 106.39 | 94.72  |
| <b>Pre-consolidation Volume (mm<sup>3</sup>)</b>          | 78804   | 80118  | 72801  | 74322  | 76995  | 71100  | 70794  | 76761   | 74241  | 73683  |
| <b>Pre-consolidation Bulk Density (g/cm<sup>3</sup>)</b>  | 1.45    | 1.57   | 1.53   | 1.64   | 1.56   | 1.54   | 1.66   | 1.74    | 1.67   | 1.56   |
| <b>Post-consolidation Volume (mm<sup>3</sup>)</b>         | 77392.8 | 79398  | 72067  | 73505  | 74601  | 69264  | 69340  | 73805.4 | 71948  | 70997  |
| <b>Post-consolidation Bulk Density (g/cm<sup>3</sup>)</b> | 1.48    | 1.58   | 1.55   | 1.66   | 1.61   | 1.58   | 1.70   | 1.81    | 1.72   | 1.62   |
| <b>Sample Mass (g)</b>                                    | 114.44  | 125.72 | 111.38 | 122.23 | 120.01 | 109.17 | 117.6  | 133.33  | 123.65 | 115.13 |
