# Supplementary material for: A bedform phase diagram for dense granular currents
Source: PubMed Central journal article supplement (PMC7280512; doi:10.1038/s41467-020-16657-z), 2020-06-08
Supplement: 41467_2020_16657_MOESM3_ESM.pdf [file 41467_2020_16657_MOESM3_ESM.pdf]

## Description of Additional Supplementary Files

File name: Supplementary Movie 1

Description: Video of an experimental granular current. Deposition is triggered by the transition of the current to an unaerated chamber at 1 m mark (approximately half way across the frame). This is a video of the current seen in Fig. 3.
